# Supplementary material for: Selective removal of silver(i) using polymer inclusion membranes containing calixpyrroles
Source: Royal Society of Chemistry journal article supplement (doi:10.1039/c9ra04347k), 2019-01-01
Supplement: c9ra04347k1.pdf [file c9ra04347k1.pdf]

Table 1. The composition of the use polymer inclusion membranes: amounts of the components as percentage participation of plasticizer, matrix and ion carrier.

| Carrier concentration (mol/dm <sup>3</sup> ) | percentage participation of plasticizer <i>o</i> -NPPE, % |            | percentage participation of support CTA, % |            | percentage participation of carrier, % |            |
|----------------------------------------------|-----------------------------------------------------------|------------|--------------------------------------------|------------|----------------------------------------|------------|
|                                              | <b>KP1</b>                                                | <b>KP2</b> | <b>KP1</b>                                 | <b>KP2</b> | <b>KP1</b>                             | <b>KP2</b> |
| 0.001                                        | 68.9                                                      | 66.9       | 31.05                                      | 33         | 0.05                                   | 0.1        |
| 0.01                                         | 69                                                        | 67         | 31                                         | 32         | 0.1                                    | 1          |
| 0.05                                         | 68                                                        | 65         | 31                                         | 32         | 1                                      | 3          |
| 0.1                                          | 67                                                        | 63         | 31                                         | 31         | 3                                      | 6          |
| 0.15                                         | 66                                                        | 62         | 30                                         | 30         | 4                                      | 8          |
| 0.2                                          | 65                                                        | 60         | 30                                         | 29         | 5                                      | 11         |
| 0.3                                          | 63                                                        | 57         | 20                                         | 27         | 7                                      | 16         |
